# Supplementary material for: HLA-Driven Convergence of HIV-1 Viral Subtypes B and F Toward the Adaptation to Immune Responses in Human Populations
Source: PubMed Central journal article supplement (PMC2565011; doi:10.1371/journal.pone.0003429), 2008-10-21
Supplement: pone.0003429.s002.pdf [file pone.0003429.s002.pdf]

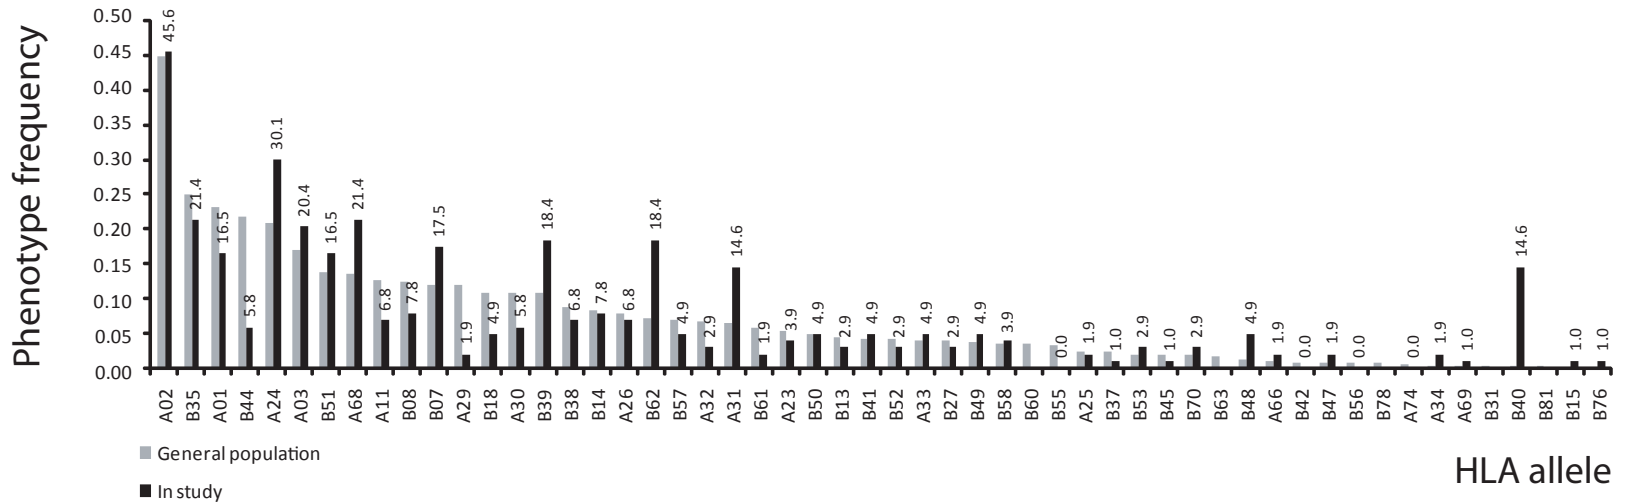

**Figure S2.** Phenotype frequency of HLA allele. Observed frequencies in general population (gray bars, obtained from [www.allelefreqencies.net](http://www.allelefreqencies.net), popstudy:Argentina-Buenos Aires) and in our study (black bars) are shown. In general, frequencies observed in our HIV-1 infected population resemble the frequencies in the general population although some alleles are overrepresented (A24, A68, B39, B07, B40, A31 and B62).
