# Supplementary material for: HLA-Driven Convergence of HIV-1 Viral Subtypes B and F Toward the Adaptation to Immune Responses in Human Populations
Source: PubMed Central journal article supplement (PMC2565011; doi:10.1371/journal.pone.0003429), 2008-10-21
Supplement: pone.0003429.s003.pdf [file pone.0003429.s003.pdf]

**Table S1** Results obtained from the phylogenetic correction analysis

| DEPENDENT MODEL |                          |                 |                          |                 | INDEPENDENT MODEL |                 |                          |                 |                          |                 |                  |
|-----------------|--------------------------|-----------------|--------------------------|-----------------|-------------------|-----------------|--------------------------|-----------------|--------------------------|-----------------|------------------|
| Trial           | Likelihood Harmonic Mean | Acceptance rate | Likelihood Harmonic Mean | Acceptance rate | Best model or LR  | Trial           | Likelihood Harmonic Mean | Acceptance rate | Likelihood Harmonic Mean | Acceptance rate | Best model or LR |
| <b>P30_A24</b>  |                          |                 |                          |                 |                   | <b>P12_B49</b>  |                          |                 |                          |                 |                  |
| 1               | -79,909                  | -0,27           | -80,979                  | -0,283333       | 2,141052          | 1               | -43,936                  | -0,303333       | -44,618                  | -0,23           | 1,36343          |
| 2               | -80,063                  | -0,246667       | -82,588                  | -0,303333       | 5,048832          | 2               | -47,563                  | -0,383333       | -43,912                  | -0,326667       | Independent      |
| 3               | -79,745                  | -0,256667       | -80,998                  | -0,303333       | 2,505056          | 3               | -50,098                  | -0,273333       | -43,184                  | -0,333333       | Independent      |
| 4               | -79,869                  | -0,28           | -80,949                  | -0,326667       | 2,160222          | 4               | -43,231                  | -0,33           | -43,937                  | -0,29           | 1,411416         |
| 5               | -80,034                  | -0,323333       | -81,155                  | -0,316667       | 2,241514          | 5               | -43,256                  | -0,396667       | -43,839                  | -0,356667       | 1,16582          |
| <b>P83_A02</b>  |                          |                 |                          |                 |                   | <b>P55_A03</b>  |                          |                 |                          |                 |                  |
| 1               | -74,160                  | -0,33           | -73,432                  | -0,263333       | Independent       | 1               | -58,711                  | -0,303333       | -63,039                  | -0,32           | 8,656066         |
| 2               | -74,577                  | -0,366667       | -73,703                  | -0,336667       | Independent       | 2               | -58,725                  | -0,223333       | -62,976                  | -0,386667       | 8,501514         |
| 3               | -73,972                  | -0,363333       | -73,675                  | -0,393333       | Independent       | 3               | -59,391                  | -0,28           | -63,239                  | -0,373333       | 7,697352         |
| 4               | -74,563                  | -0,24           | -74,271                  | -0,33           | Independent       | 4               | -58,636                  | -0,243333       | -63,069                  | -0,39           | 8,8667           |
| 5               | -74,161                  | -0,313333       | -73,699                  | -0,346667       | Independent       | 5               | -59,079                  | -0,363333       | -63,151                  | -0,376667       | 8,144018         |
| <b>P125_A01</b> |                          |                 |                          |                 |                   | <b>P90_B40</b>  |                          |                 |                          |                 |                  |
| 1               | -69,711                  | -0,253333       | -68,555                  | -0,216667       | Independent       | 1               | -62,562                  | -0,26           | -60,692                  | -0,283333       | Independent      |
| 2               | -69,651                  | -0,336667       | -68,832                  | -0,25           | Independent       | 2               | -62,627                  | -0,26           | -60,742                  | -0,27           | Independent      |
| 3               | -69,192                  | -0,233333       | -69,167                  | -0,263333       | Independent       | 3               | -61,816                  | -0,253333       | -59,865                  | -0,303333       | Independent      |
| 4               | -70,543                  | -0,333333       | -68,962                  | -0,246667       | Independent       | 4               | -62,132                  | -0,27           | -60,111                  | -0,316667       | Independent      |
| 5               | -69,216                  | -0,29           | -69,495                  | -0,25           | 0,559012          | 5               | -61,616                  | -0,293333       | -60,263                  | -0,27           | Independent      |
| <b>P28_A03</b>  |                          |                 |                          |                 |                   | <b>P146_A02</b> |                          |                 |                          |                 |                  |
| 1               | -68,414                  | -0,313333       | -77,153                  | -0,263333       | 17,477414         | 1               | -95,943                  | -0,26           | -96,498                  | -0,353333       | 1,10969          |
| 2               | -68,686                  | -0,263333       | -78,305                  | -0,26           | 19,23724          | 2               | -96,319                  | -0,286667       | -96,548                  | -0,35           | 0,458024         |
| 3               | -68,630                  | -0,27           | -77,913                  | -0,313333       | 18,564472         | 3               | -96,687                  | -0,253333       | -96,542                  | -0,366667       | Independent      |
| 4               | -69,576                  | -0,296667       | -77,007                  | -0,226667       | 14,863502         | 4               | -95,949                  | -0,25           | -96,378                  | -0,313333       | 0,856946         |
| 5               | -69,609                  | -0,313333       | -77,644                  | -0,26           | 16,071304         | 5               | -95,916                  | -0,263333       | -96,524                  | -0,346667       | 1,216658         |
| <b>P46_A24</b>  |                          |                 |                          |                 |                   | <b>P215_A01</b> |                          |                 |                          |                 |                  |
| 1               | -74,510                  | -0,236667       | -76,025                  | -0,27           | 3,0299            | 1               | -71,102                  | -0,31           | -68,838                  | -0,366667       | Independent      |
| 2               | -74,646                  | -0,236667       | -75,389                  | -0,27           | 1,48498           | 2               | -69,856                  | -0,263333       | -68,598                  | -0,293333       | Independent      |
| 3               | -74,692                  | -0,296667       | -75,389                  | -0,273333       | 1,394476          | 3               | -69,876                  | -0,293333       | -68,181                  | -0,286667       | Independent      |
| 4               | -75,268                  | -0,37           | -75,934                  | -0,24           | 1,331736          | 4               | -69,459                  | -0,32           | -68,119                  | -0,34           | Independent      |
| 5               | -74,473                  | -0,253333       | -75,473                  | -0,323333       | 1,99874           | 5               | -69,365                  | -0,223333       | -68,609                  | -0,343333       | Independent      |
| <b>P81_B40</b>  |                          |                 |                          |                 |                   | <b>P339_A01</b> |                          |                 |                          |                 |                  |
| 1               | -50,939                  | -0,256667       | -51,632                  | -0,33           | 1,38668           | 1               | -61,280                  | -0,386667       | -60,927                  | -0,39           | Independent      |
| 2               | -50,381                  | -0,253333       | -51,254                  | -0,343333       | 1,744834          | 2               | -61,818                  | -0,38           | -60,804                  | -0,353333       | Independent      |
| 3               | -50,726                  | -0,293333       | -52,302                  | -0,336667       | 3,15293           | 3               | -61,837                  | -0,4            | -60,764                  | -0,39           | Independent      |
| 4               | -50,445                  | -0,233333       | -51,213                  | -0,316667       | 1,536788          | 4               | -61,902                  | -0,326667       | -61,042                  | -0,376667       | Independent      |
| 5               | -50,879                  | -0,316667       | -51,668                  | -0,326667       | 1,577856          | 5               | -61,577                  | -0,39           | -61,331                  | -0,343333       | Independent      |
| <b>P118_A11</b> |                          |                 |                          |                 |                   | <b>P312_B49</b> |                          |                 |                          |                 |                  |
| 1               | -33,662                  | -0,32           | -36,381                  | -0,323333       | 5,437886          | 1               | -60,804                  | -0,263333       | -61,359                  | -0,373333       | 1,111334         |
| 2               | -34,337                  | -0,236667       | -36,532                  | -0,29           | 4,39053           | 2               | -62,973                  | -0,283333       | -61,437                  | -0,276667       | Independent      |
| 3               | -33,420                  | -0,31           | -36,155                  | -0,326667       | 5,471404          | 3               | -60,716                  | -0,316667       | -61,128                  | -0,256667       | 0,823558         |
| 4               | -33,820                  | -0,253333       | -36,029                  | -0,306667       | 4,418136          | 4               | -60,553                  | -0,306667       | -61,112                  | -0,216667       | 1,119274         |
| 5               | -33,743                  | -0,246667       | -36,257                  | -0,27           | 5,027364          | 5               | -61,315                  | -0,333333       | -60,714                  | -0,226667       | Independent      |
| <b>P242_B57</b> |                          |                 |                          |                 |                   | <b>P342_A24</b> |                          |                 |                          |                 |                  |
| 1               | -44,783                  | -0,246667       | -48,827                  | -0,39           | 8,087374          | 1               | -56,254                  | -0,323333       | -54,463                  | -0,29           | Independent      |
| 2               | -45,069                  | -0,36           | -50,875                  | -0,373333       | 11,610946         | 2               | -56,548                  | -0,316667       | -54,907                  | -0,296667       | Independent      |
| 3               | -45,489                  | -0,303333       | -49,088                  | -0,36           | 7,198572          | 3               | -56,623                  | -0,256667       | -54,746                  | -0,316667       | Independent      |
| 4               | -45,866                  | -0,296667       | -49,073                  | -0,33           | 6,412982          | 4               | -58,037                  | -0,316667       | -54,228                  | -0,306667       | Independent      |
| 5               | -45,519                  | -0,356667       | -49,089                  | -0,4            | 7,139418          | 5               | -56,630                  | -0,21           | -54,705                  | -0,28           | Independent      |
| <b>P303_B08</b> |                          |                 |                          |                 |                   | <b>P342_A31</b> |                          |                 |                          |                 |                  |
| 1               | -47,024                  | -0,203333       | -47,167                  | -0,223333       | 0,285048          | 1               | -39,333                  | -0,326667       | -38,603                  | -0,31           | Independent      |
| 2               | -47,315                  | -0,293333       | -47,264                  | -0,303333       | Independent       | 2               | -39,717                  | -0,29           | -39,587                  | -0,313333       | Independent      |
| 3               | -47,225                  | -0,243333       | -47,288                  | -0,246667       | 0,125084          | 3               | -40,592                  | -0,306667       | -39,134                  | -0,27           | Independent      |
| 4               | -47,557                  | -0,22           | -47,498                  | -0,2            | Independent       | 4               | -38,993                  | -0,253333       | -38,455                  | -0,223333       | Independent      |
| 5               | -47,926                  | -0,29           | -47,155                  | -0,286667       | Independent       | 5               | -39,465                  | -0,22           | -38,684                  | -0,293333       | Independent      |
| <b>P65_A02</b>  |                          |                 |                          |                 |                   | <b>P357_A11</b> |                          |                 |                          |                 |                  |
| 1               | -78,613                  | -0,266667       | -79,734                  | -0,336667       | 2,24172           | 1               | -53,572                  | -0,22           | -55,381                  | -0,326667       | 3,318628         |
| 2               | -78,611                  | -0,253333       | -80,122                  | -0,306667       | 3,021794          | 2               | -52,822                  | -0,3            | -54,681                  | -0,363333       | 3,71707          |
| 3               | -78,806                  | -0,32           | -79,944                  | -0,346667       | 2,274386          | 3               | -53,117                  | -0,273333       | -54,666                  | -0,333333       | 3,077676         |
| 4               | -78,469                  | -0,303333       | -79,920                  | -0,353333       | 2,901506          | 4               | -53,645                  | -0,35           | -56,699                  | -0,31           | 6,109122         |
| 5               | -78,805                  | -0,343333       | -79,850                  | -0,286667       | 2,090716          | 5               | -53,122                  | -0,22           | -56,591                  | -0,366667       | 6,938418         |
| <b>P357_B07</b> |                          |                 |                          |                 |                   | <b>P372_A31</b> |                          |                 |                          |                 |                  |
| 1               | -73,839                  | -0,31           | -75,075                  | -0,373333       | 2,47302           | 1               | -62,109                  | -0,256667       | -59,910                  | -0,246667       | Independent      |
| 2               | -74,004                  | -0,3            | -75,016                  | -0,353333       | 2,143562          | 2               | -59,910                  | -0,286667       | -59,792                  | -0,323333       | Independent      |
| 3               | -73,801                  | -0,313333       | -75,054                  | -0,243333       | 2,505346          | 3               | -59,895                  | -0,3            | -59,211                  | -0,223333       | Independent      |
| 4               | -73,942                  | -0,3            | -75,784                  | -0,276667       | 3,683128          | 4               | -60,503                  | -0,273333       | -59,253                  | -0,236667       | Independent      |
| 5               | -73,864                  | -0,283333       | -74,894                  | -0,32           | 2,060035          | 5               | -59,829                  | -0,28           | -59,230                  | -0,316667       | Independent      |

Details of the results obtained from the phylogenetic correction performed over the 22 positions where polymorphisms were significantly associated with an HLA allele ( $q$ -value<0.2). Five trials were performed per position. When the best model fitted to data is the independent model, this is shown on the sixth column.
