# Supplementary material for: HLA-Driven Convergence of HIV-1 Viral Subtypes B and F Toward the Adaptation to Immune Responses in Human Populations
Source: PubMed Central journal article supplement (PMC2565011; doi:10.1371/journal.pone.0003429), 2008-10-21
Supplement: pone.0003429.s004.pdf [file pone.0003429.s004.pdf]

**Table S2** Details of the sequences analyzed in our study according to sampling year and viral subtype

**Sample year \* Viral Subtype Crosstabulation**

|              |                             |                      | Viral Subtype |              |            |              |               |               |
|--------------|-----------------------------|----------------------|---------------|--------------|------------|--------------|---------------|---------------|
|              |                             |                      | B             | BF           | BF200      | C            | F             |               |
| Sample year  | 1987                        | Count                | 3             | 0            | 1          | 0            | 0             | <b>4</b>      |
|              |                             | % within Sample year | 75,0%         | ,0%          | 25,0%      | ,0%          | ,0%           | <b>100,0%</b> |
|              | 1988                        | Count                | 3             | 2            | 2          | 0            | 2             | <b>9</b>      |
|              |                             | % within Sample year | 33,3%         | 22,2%        | 22,2%      | ,0%          | 22,2%         | <b>100,0%</b> |
|              | 1989                        | Count                | 3             | 2            | 0          | 0            | 3             | <b>8</b>      |
|              |                             | % within Sample year | 37,5%         | 25,0%        | ,0%        | ,0%          | 37,5%         | <b>100,0%</b> |
|              | 1991                        | Count                | 3             | 0            | 0          | 0            | 0             | <b>3</b>      |
|              |                             | % within Sample year | 100,0%        | ,0%          | ,0%        | ,0%          | ,0%           | <b>100,0%</b> |
|              | 1992                        | Count                | 0             | 0            | 2          | 0            | 1             | <b>3</b>      |
|              |                             | % within Sample year | ,0%           | ,0%          | 66,7%      | ,0%          | 33,3%         | <b>100,0%</b> |
|              | 1993                        | Count                | 2             | 0            | 0          | 0            | 1             | <b>3</b>      |
|              |                             | % within Sample year | 66,7%         | ,0%          | ,0%        | ,0%          | 33,3%         | <b>100,0%</b> |
|              | 1994                        | Count                | 1             | 1            | 0          | 0            | 0             | <b>2</b>      |
|              |                             | % within Sample year | 50,0%         | 50,0%        | ,0%        | ,0%          | ,0%           | <b>100,0%</b> |
|              | 1995                        | Count                | 0             | 0            | 1          | 0            | 1             | <b>2</b>      |
|              |                             | % within Sample year | ,0%           | ,0%          | 50,0%      | ,0%          | 50,0%         | <b>100,0%</b> |
|              | 1996                        | Count                | 0             | 1            | 3          | 0            | 2             | <b>6</b>      |
|              |                             | % within Sample year | ,0%           | 16,7%        | 50,0%      | ,0%          | 33,3%         | <b>100,0%</b> |
|              | 1997                        | Count                | 1             | 1            | 1          | 0            | 1             | <b>4</b>      |
|              |                             | % within Sample year | 25,0%         | 25,0%        | 25,0%      | ,0%          | 25,0%         | <b>100,0%</b> |
|              | 1998                        | Count                | 3             | 0            | 3          | 0            | 3             | <b>9</b>      |
|              |                             | % within Sample year | 33,3%         | ,0%          | 33,3%      | ,0%          | 33,3%         | <b>100,0%</b> |
|              | 1999                        | Count                | 2             | 0            | 3          | 0            | 2             | <b>7</b>      |
|              |                             | % within Sample year | 28,6%         | ,0%          | 42,9%      | ,0%          | 28,6%         | <b>100,0%</b> |
|              | 2000                        | Count                | 2             | 5            | 3          | 0            | 0             | <b>10</b>     |
|              |                             | % within Sample year | 20,0%         | 50,0%        | 30,0%      | ,0%          | ,0%           | <b>100,0%</b> |
|              | 2001                        | Count                | 10            | 3            | 4          | 0            | 3             | <b>20</b>     |
|              |                             | % within Sample year | 50,0%         | 15,0%        | 20,0%      | ,0%          | 15,0%         | <b>100,0%</b> |
|              | 2002                        | Count                | 3             | 1            | 8          | 0            | 4             | <b>16</b>     |
|              |                             | % within Sample year | 18,8%         | 6,3%         | 50,0%      | ,0%          | 25,0%         | <b>100,0%</b> |
|              | 2003                        | Count                | 15            | 6            | 11         | 0            | 9             | <b>41</b>     |
|              |                             | % within Sample year | 36,6%         | 14,6%        | 26,8%      | ,0%          | 22,0%         | <b>100,0%</b> |
|              | 2004                        | Count                | 31            | 9            | 23         | 0            | 18            | <b>81</b>     |
|              |                             | % within Sample year | 38,3%         | 11,1%        | 28,4%      | ,0%          | 22,2%         | <b>100,0%</b> |
|              | 2005                        | Count                | 6             | 3            | 1          | 0            | 4             | <b>14</b>     |
|              |                             | % within Sample year | 42,9%         | 21,4%        | 7,1%       | ,0%          | 28,6%         | <b>100,0%</b> |
|              | 2006                        | Count                | 5             | 1            | 2          | 1            | 1             | <b>10</b>     |
|              |                             | % within Sample year | 50,0%         | 10,0%        | 20,0%      | 10,0%        | 10,0%         | <b>100,0%</b> |
| <b>Total</b> | <b>Count</b>                | <b>93</b>            | <b>35</b>     | <b>68</b>    | <b>1</b>   | <b>55</b>    | <b>252</b>    |               |
|              | <b>% within Sample year</b> | <b>36,9%</b>         | <b>13,9%</b>  | <b>27,0%</b> | <b>,4%</b> | <b>21,8%</b> | <b>100,0%</b> |               |

In our study, samples were characterized as subtype B (B), F (F), C (C) or recombinants between the subtypes B and F. In this last group samples were further classified accordingly to whether they shared the same structure of recombination with one recombination spot at nucleotide 200 (989 in HXB2) in our alignment (BF200) or other recombinant structures (BF).
