# Supplementary material for: HLA-Driven Convergence of HIV-1 Viral Subtypes B and F Toward the Adaptation to Immune Responses in Human Populations
Source: PubMed Central journal article supplement (PMC2565011; doi:10.1371/journal.pone.0003429), 2008-10-21
Supplement: pone.0003429.s005.pdf [file pone.0003429.s005.pdf]

**Table S3** Frequencies of the 18 potential CTL-escape mutations

| Mutation                                                                             | Sampling period |           |           | Viral subtype |
|--------------------------------------------------------------------------------------|-----------------|-----------|-----------|---------------|
|                                                                                      | 1987-1997       | 1998-2002 | 2003-2006 |               |
| <i>Mutations with a significant association to an HLA allele (q-value &lt; 0.02)</i> |                 |           |           |               |
| P028                                                                                 | 25,0%           | 35,0%     | 29,1%     | B             |
| P028                                                                                 | 9,1%            | 25,0%     | 14,3%     | F             |
| P030                                                                                 | 12,5%           | 40,0%     | 43,6%     | B             |
| P030                                                                                 | 100,0%          | 66,7%     | 71,4%     | F             |
| P046                                                                                 | 6,3%            | 25,0%     | 14,5%     | B             |
| P046                                                                                 | 72,7%           | 66,7%     | 71,4%     | F             |
| P055                                                                                 | 18,8%           | 25,0%     | 14,3%     | B             |
| P055                                                                                 | 0,0%            | 8,3%      | 3,3%      | F             |
| P065                                                                                 | 0,0%            | 20,0%     | 7,1%      | B             |
| P065                                                                                 | 0,0%            | 16,7%     | 16,7%     | F             |
| P081                                                                                 | 0,0%            | 15,0%     | 10,7%     | B             |
| P081                                                                                 | 4,8%            | 12,1%     | 11,9%     | F             |
| P083                                                                                 | 100,0%          | 95,0%     | 98,2%     | B             |
| P083                                                                                 | 52,4%           | 63,6%     | 76,1%     | F             |
| P118                                                                                 | 6,3%            | 10,0%     | 8,9%      | B             |
| P118                                                                                 | 14,3%           | 18,2%     | 19,4%     | F             |
| P125                                                                                 | 25,0%           | 50,0%     | 46,4%     | B             |
| P125                                                                                 | 100,0%          | 90,9%     | 100,0%    | F             |
| P242                                                                                 | 0,0%            | 5,0%      | 10,5%     | B             |
| P242                                                                                 | 14,3%           | 15,2%     | 10,1%     | F             |
| P357                                                                                 | 18,8%           | 35,0%     | 40,4%     | B             |
| P357                                                                                 | 9,5%            | 18,2%     | 21,7%     | F             |
| <i>Mutations with a significant trend in time (Chi-squared for trend &lt; 0.05)</i>  |                 |           |           |               |
| P076                                                                                 | 14,3%           | 45,5%     | 38,8%     | F             |
| P076                                                                                 | 37,5%           | 50,0%     | 66,1%     | B             |
| P084                                                                                 | 95,2%           | 97,0%     | 97,0%     | F             |
| P084                                                                                 | 18,7%           | 45,0%     | 54,4%     | B             |
| P095                                                                                 | 9,5%            | 3,0%      | 22,4%     | F             |
| P095                                                                                 | 12,5%           | 30,0%     | 35,7%     | B             |
| P215                                                                                 | 28,6%           | 18,2%     | 24,6%     | F             |
| P215                                                                                 | 37,5%           | 15,0%     | 12,3%     | B             |
| P218                                                                                 | 0,0%            | 18,2%     | 7,2%      | F             |
| P218                                                                                 | 0,0%            | 5,0%      | 15,8%     | B             |
| P223                                                                                 | 0,0%            | 12,1%     | 23,2%     | F             |
| P223                                                                                 | 18,8%           | 40,0%     | 42,1%     | B             |
| P280                                                                                 | 0,0%            | 12,1%     | 20,3%     | F             |
| P280                                                                                 | 93,8%           | 70,0%     | 82,5%     | B             |

Detail of the frequencies of the 11 polymorphisms identified as potential CTL-escape mutations through statistical analysis (mutation at position 357 was associated with two different HLA alleles) and the 7 additional identified through trend analysis, according to viral subtype.
