# Supplementary material for: HLA-Driven Convergence of HIV-1 Viral Subtypes B and F Toward the Adaptation to Immune Responses in Human Populations
Source: PubMed Central journal article supplement (PMC2565011; doi:10.1371/journal.pone.0003429), 2008-10-21
Supplement: pone.0003429.s006.pdf [file pone.0003429.s006.pdf]

**Table S4** Results from the statistical analysis for identification of CTL-escape mutations performed over genes *pol* and *vpu*

|            |     | <i>p</i> -value | OR    | Epitope analysis                                                                                                  |                 | <i>p</i> -value for association with viral subtype | Prevalence on viral subtype |        |
|------------|-----|-----------------|-------|-------------------------------------------------------------------------------------------------------------------|-----------------|----------------------------------------------------|-----------------------------|--------|
|            |     |                 |       | Sequence                                                                                                          | Known/predicted |                                                    | B                           | F      |
| <i>pol</i> |     |                 |       |                                                                                                                   |                 |                                                    |                             |        |
| P067       | B49 | 0,001           | 64,50 |                                                                                                                   | ?               | 0,352                                              |                             |        |
| P503       | B62 | 0,002           | 12,14 |                                                                                                                   | ?               | 0,513                                              |                             |        |
| P273       | B35 | 0,002           | 8,24  | <u>Q</u> NPDIVIQY                                                                                                 | known           | <b>0,013</b>                                       | 8,9%                        | 100,0% |
| P016       | B57 | 0,003           | 31,13 |                                                                                                                   | -               | 1,000                                              |                             |        |
| P324       | B44 | 0,003           | 28,00 |                                                                                                                   | -               | 1,000                                              |                             |        |
| P310       | B62 | 0,003           | 7,40  |                                                                                                                   | ?               | 0,497                                              |                             |        |
| <i>vpu</i> |     |                 |       |                                                                                                                   |                 |                                                    |                             |        |
| P71        | B44 | 0,001           | 28,46 | G <u>E</u> M <u>G</u> H <u>L</u> A <u>P</u> G <u>N</u> I / A <u>E</u> E <u>L</u> A <u>A</u> L <u>G</u> E <u>M</u> | CBS             | 0,502                                              |                             |        |
| P48        | B39 | 0,001           | 15,63 |                                                                                                                   | -               | 1,000                                              |                             |        |
| P71        | B40 | 0,011           | 4,19  | G <u>E</u> M <u>G</u> H <u>L</u> A <u>P</u> G <u>N</u> I / A <u>E</u> E <u>L</u> A <u>A</u> L <u>G</u> E <u>M</u> | CBS             | 0,502                                              |                             |        |
| P78        | B39 | 0,013           | 0,27  |                                                                                                                   | -               | <b>0,000</b>                                       | 88,5%                       | 15,8%  |
| P43        | B57 | 0,018           | 11,85 |                                                                                                                   | -               | 0,180                                              |                             |        |
| P70        | B40 | 0,020           | 3,67  | G <u>E</u> M <u>G</u> H <u>L</u> A <u>P</u> G <u>N</u> I / A <u>E</u> E <u>L</u> A <u>A</u> L <u>G</u> E <u>M</u> | CBS             | <b>0,007</b>                                       | 15,4%                       | 50,0%  |
| P3         | B07 | 0,020           | 0,27  | Q <u>P</u> L <u>V</u> I <u>L</u> A <u>I</u> V <u>A</u> L                                                          | CBS             | 1,000                                              |                             |        |
| P10        | B44 | 0,021           | 9,88  |                                                                                                                   | -               | 0,208                                              |                             |        |
| P64        | B48 | 0,021           | 19,11 |                                                                                                                   | ?               | 0,161                                              |                             |        |
| P40        | B44 | 0,026           | 8,78  |                                                                                                                   | -               | 0,180                                              |                             |        |
| P2         | B44 | 0,026           | 7,67  |                                                                                                                   | -               | 0,440                                              |                             |        |
| P61        | B39 | 0,029           | 0,33  |                                                                                                                   | -               | <b>0,000</b>                                       | 100,0%                      | 13,2%  |
| P38        | B44 | 0,033           | 7,80  |                                                                                                                   | -               | <b>0,018</b>                                       | 11,3%                       | 100,0% |

Detailed are the *p*-values and ORs of the 19 sites across *pol* and *vpu* genes where evidence of CTL-escape mutations were found. Correction for multiple comparisons where performed and only associations with a *q*-value lower than 0.2 are shown. For those positions located within known or predicted epitopes, the aminoacidic sequence is detailed. For those significantly associated with viral subtype, *p*-values for association and prevalence on both B and F subtypes are provided.
